# Supplementary material
Source: PubMed Central journal article supplement (PMC3310286)
Supplement: NIHMS333364-supplement-01.pdf [file NIHMS333364-supplement-01.pdf]

**Table 1**

| Binding Event | CAV $\beta$ | Binding Force (nN) | Binding Event | CAV $\beta$ | Binding Force (nN) | Binding Event | CAV $\beta$ | Binding Force (nN) |
|---------------|-------------|--------------------|---------------|-------------|--------------------|---------------|-------------|--------------------|
| 1             |             | 0.044              | 92            |             | 0.346              | 178           | +           | 0.128              |
| 2             | +           | 0.089              | 93            |             | 0.069              | 179           |             | 0.479              |
| 4             |             | 0.059              | 94            | +           | 0.151              | 180           |             | 0.099              |
| 5             | +           | 0.056              | 95            | +           | 0.439              | 181           |             | 0.005              |
| 6             | +           | 0.104              | 96            | +           | 0.274              | 182           | +           | 0.377              |
| 7             | +           | 0.259              | 97            |             | 0.089              | 184           |             | 0.037              |
| 8             | +           | 0.103              | 98            |             | 0.286              | 185           |             | 0.076              |
| 9             | +           | 0.185              | 100           | +           | 0.382              | 186           |             | 0.101              |
| 10            | +           | 0.434              | 101           | +           | 0.158              | 187           |             | 0.131              |
| 14            |             | 0.067              | 104           | +           | 0.094              | 188           |             | 0.02               |
| 15            | +           | 0.062              | 105           |             | 0.081              | 189           |             | 0.093              |
| 18            |             | 0.098              | 106           |             | 0.204              | 190           |             | 0.027              |
| 19            | +           | 0.034              | 108           |             | 0.042              | 191           | +           | 0.447              |
| 20            | +           | 0.113              | 109           | +           | 0.543              | 192           |             | 0.034              |
| 22            |             | 0.362              | 110           |             | 0.034              | 193           |             | 0.077              |
| 23            | +           | 0.452              | 112           | +           | 0.108              | 194           | +           | 0.155              |
| 24            |             | 0.045              | 114           | +           | 0.272              | 195           | +           | 0.099              |
| 25            |             | 0.081              | 115           | +           | 0.239              | 196           |             | 0.145              |
| 26            | +           | 0.02               | 116           | +           | 0.365              | 197           |             | 0.027              |
| 28            | +           | 0.463              | 117           |             | 0.126              | 198           | +           | 0.437              |
| 29            | +           | 0.047              | 118           |             | 0.076              | 200           | +           | 0.124              |
| 30            |             | 0.355              | 121           |             | 0.082              | 201           | +           | 0.076              |

|    |   |       |     |   |       |     |   |       |
|----|---|-------|-----|---|-------|-----|---|-------|
| 31 |   | 0.457 | 122 |   | 0.452 | 202 | + | 0.042 |
| 33 | + | 0.338 | 123 |   | 0.116 | 205 |   | 0.387 |
| 35 | + | 0.444 | 124 |   | 0.256 | 207 |   | 0.027 |
| 36 | + | 0.025 | 125 |   | 0.035 | 208 |   | 0.084 |
| 37 | + | 0.062 | 127 |   | 0.076 | 209 |   | 0.032 |
| 38 | + | 0.257 | 128 |   | 0.336 | 210 | + | 0.131 |
| 40 | + | 0.37  | 129 |   | 0.14  | 211 |   | 0.022 |
| 44 |   | 0.079 | 130 |   | 0.153 | 212 | + | 0.185 |
| 45 | + | 0.392 | 132 |   | 0.04  | 213 |   | 0.072 |
| 46 |   | 0.093 | 134 |   | 0.037 | 214 |   | 0.128 |
| 47 |   | 0.14  | 136 |   | 0.252 | 219 |   | 0.091 |
| 48 | + | 0.399 | 137 |   | 0.079 | 220 |   | 0.104 |
| 49 | + | 0.084 | 138 |   | 0.045 | 222 |   | 0.091 |
| 50 | + | 0.363 | 142 |   | 0.045 | 223 |   | 0.044 |
| 51 | + | 0.542 | 143 |   | 0.002 | 224 | + | 0.13  |
| 52 | + | 0.111 | 144 | + | 0.118 | 225 |   | 0.103 |
| 53 | + | 0.091 | 145 |   | 0.084 | 228 |   | 0.404 |
| 55 |   | 0.071 | 146 |   | 0.365 | 229 | + | 0.35  |
| 56 |   | 0.025 | 148 |   | 0.138 | 230 | + | 0.345 |
| 59 |   | 0.089 | 149 |   | 0.175 | 231 |   | 0.126 |
| 60 | + | 0.14  | 150 |   | 0.146 | 232 |   | 0.027 |
| 61 |   | 0.167 | 151 | + | 0.37  | 233 | + | 0.483 |
| 62 |   | 0.091 | 152 | + | 0.037 | 234 |   | 0.486 |
| 63 |   | 0.049 | 158 |   | 0.15  | 235 |   | 0.419 |
| 64 |   | 0.084 | 160 | + | 0.054 | 236 |   | 0.005 |
| 65 |   | 0.056 | 161 | + | 0.099 | 237 |   | 0.385 |
| 67 | + | 0.494 | 162 | + | 0.108 | 238 |   | 0.362 |

|    |   |       |     |   |       |     |   |       |
|----|---|-------|-----|---|-------|-----|---|-------|
| 68 | + | 0.333 | 163 |   | 0.069 | 240 | + | 0.328 |
| 75 | + | 0.309 | 164 | + | 0.197 | 241 | + | 0.093 |
| 76 | + | 0.35  | 165 | + | 0.457 | 242 |   | 0.18  |
| 77 |   | 0.067 | 166 |   | 0.135 | 243 |   | 0.042 |
| 78 | + | 0.18  | 167 |   | 0.116 | 244 |   | 0.089 |
| 81 | + | 0.066 | 168 |   | 0.283 | 245 | + | 0.604 |
| 83 |   | 0.05  | 169 |   | 0.101 | 246 | + | 0.703 |
| 84 |   | 0.012 | 170 |   | 0.441 | 247 | + | 0.451 |
| 85 | + | 0.479 | 171 |   | 0.207 | 248 |   | 0.436 |
| 88 |   | 0.303 | 172 |   | 0.025 | 249 |   | 0.533 |
| 89 |   | 0.084 | 173 |   | 0.022 | 250 |   | 0.523 |
| 90 |   | 0.044 | 174 | + | 0.419 | 252 |   | 0.367 |
| 91 | + | 0.156 | 175 |   | 0.511 | 253 | + | 0.299 |
|    |   |       |     |   |       | 254 | + | 0.074 |

**Table 1:** Corresponding data used to generate images in the above figures. Binding event column represents the grid location number. +: denotes presence of CAV  $\beta$ -GFP detected in confocal images. We defined the interactions that had at least 50% green in that binding event as being in CAV1  $\beta$ .
